# Supplementary material
Source: Royal Society of Chemistry journal article supplement (doi:10.1039/d6tc00648e)
Supplement: d6tc00648e1.pdf [file d6tc00648e1.pdf]

Supplementary information for

**A Disordered–Ordered TiO<sub>2</sub>/TiO<sub>2-x</sub> Homostructure Hosting a High-Mobility Interfacial Conductive Layer for Robust Symmetric Rectification**

Yunyun Li<sup>1,2</sup>, Chenglin Li<sup>3</sup>, Lei Wang<sup>2</sup>, Zhuoyuan Li<sup>2</sup>, Yuqing Zhu<sup>2</sup>, Diwen Zhou<sup>2,\*</sup>, Guoming Lin<sup>2,\*</sup>, Weiguang Lan<sup>2,3</sup>, Yuanwei Lin<sup>4,5,\*</sup>

<sup>1</sup> Fujian Provincial Key Laboratory of Ecology-Toxicological Effects & Control for Emerging Contaminants, Key Laboratory of Ecological Environment and Information Atlas, College of Environmental and Biological Engineering, Putian University, Putian 351100, China

<sup>2</sup> State Key Laboratory of Green and Efficient Development of Phosphorus Resources & School of Future Technology, Fuzhou 350108, China

<sup>3</sup> Department of Chemistry & Faculty of Science, National University of Singapore, 119077, Singapore.

<sup>4</sup> Beijing National Laboratory for Molecular Sciences, State Key Laboratory for Structural Chemistry of Unstable and Stable Species, College of Chemistry and Molecular Engineering, Peking University, Beijing, 100871, China.

<sup>5</sup> Center for Nanoscience and Nanotechnology, Academy for Advanced Interdisciplinary Studies, Peking University, Beijing, 100871, China.

\*Email: diwenzhou@fzu.edu.cn (D.Z.); linguoming@fzu.edu.cn (G.L.); yuanweilin@pku.edu.cn (Y.L.)

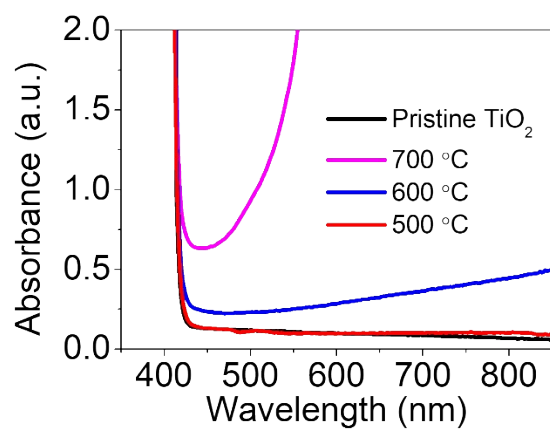

**Figure S1.** UV-vis absorption evolution of rutile TiO<sub>2</sub> single crystals after CVR in H<sub>2</sub> at 500, 600, and 700 °C for 2 h.

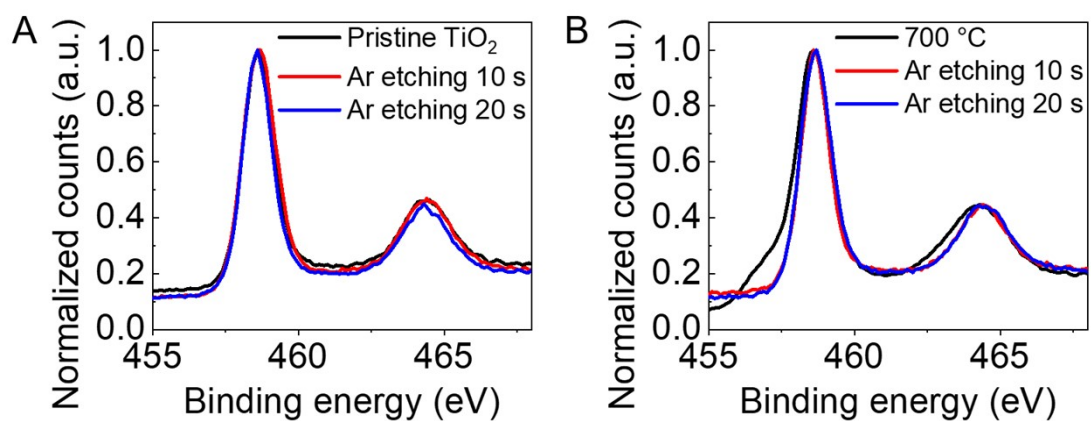

**Figure S2.** Ti 2p XPS spectra collected before and after Ar-ion etching. (A) Comparison of pristine TiO<sub>2</sub> measured at the surface and after Ar etching for 10 and 20 s. (B) Comparison of the 700 °C-treated TiO<sub>2-x</sub> sample measured at the surface and after Ar etching for 10 and 20 s.

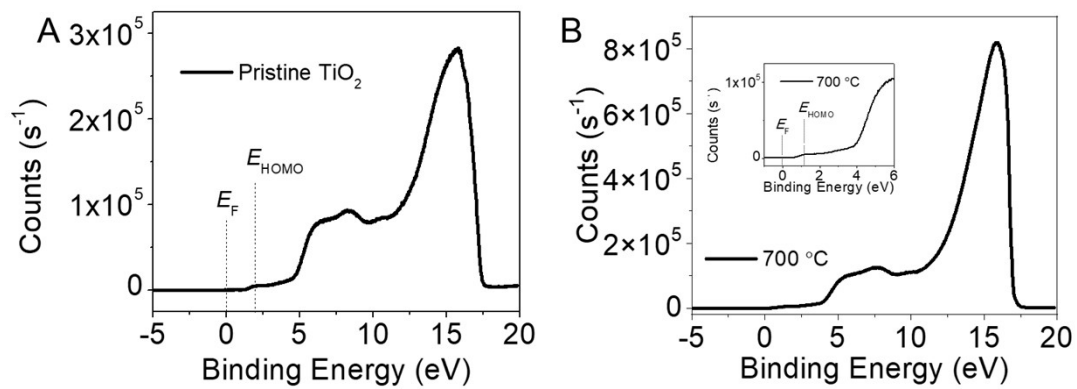

**Figure S3. Ultraviolet photoelectronic spectra of the samples treated by CVD at different temperatures. (A) Pristine rutile crystal. (B) Crystal treated by 700 °C, Inset: enlarged view of the low binding energy area.**

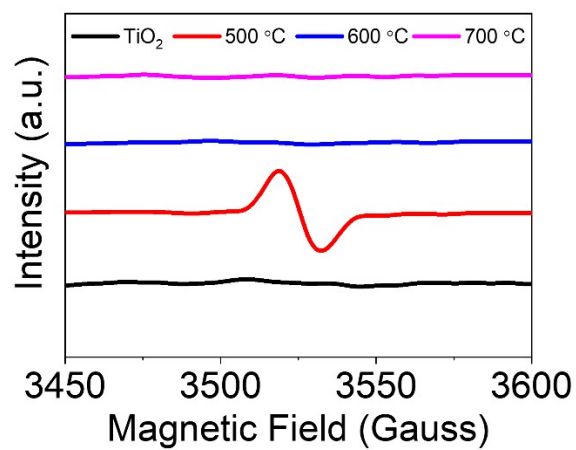

**Figure S4.** Electron paramagnetic resonance spectra of the samples.

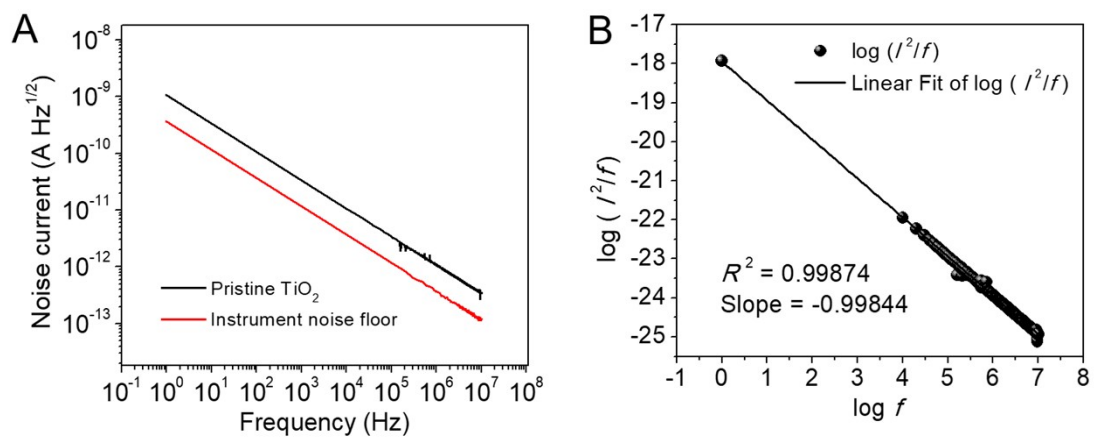

**Figure S5. Locked-in amplifier characterization of the rutile crystal device.** (A) Frequency dependent noise current of the device based on pristine TiO<sub>2</sub> single crystal treated at 500 °C. (B) Linear fit of the noise current shown in (A).

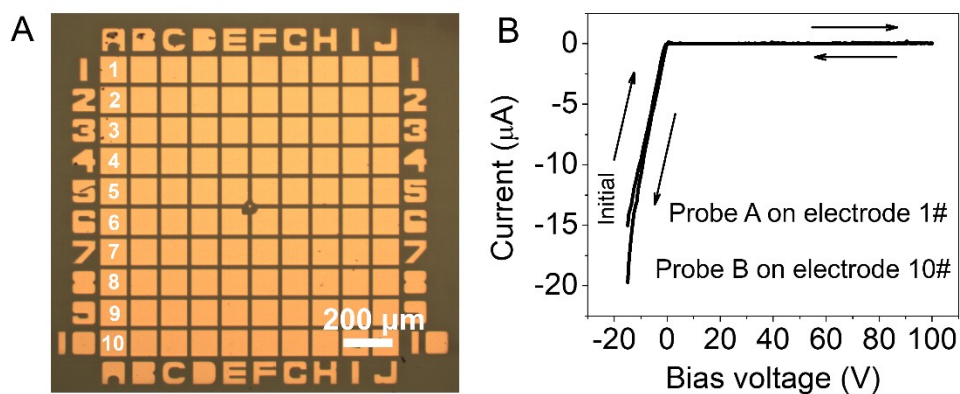

**Figure S6. Investigation of the reverse breakdown voltage.** (A) Optical image of the rectifying diodes array. (B)  $I$ - $V$  curve of the rectifying diode with probe A and B put on electrode 1# and 10#, respectively.

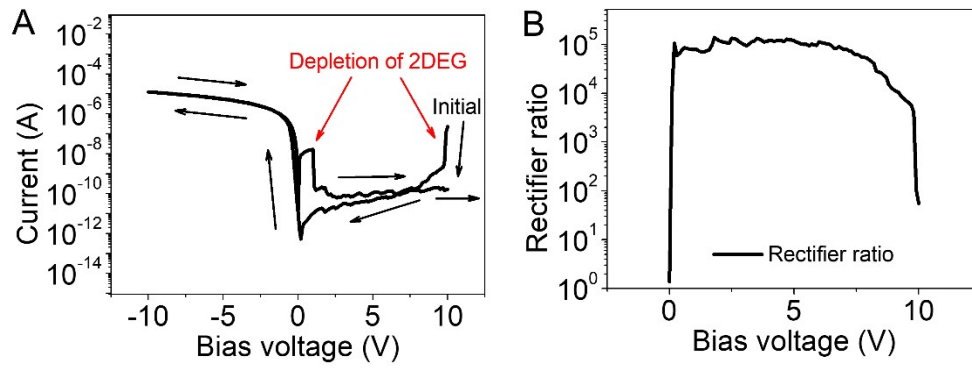

**Figure S7. Device performances with sweeping range of  $\pm 10$  V. (A)  $I$ - $V$  curve of the rectifying diode plot on logarithmic coordinates presenting the depletion of 2DEG. (B) Bias voltage dependent rectifier ratio of the device.**

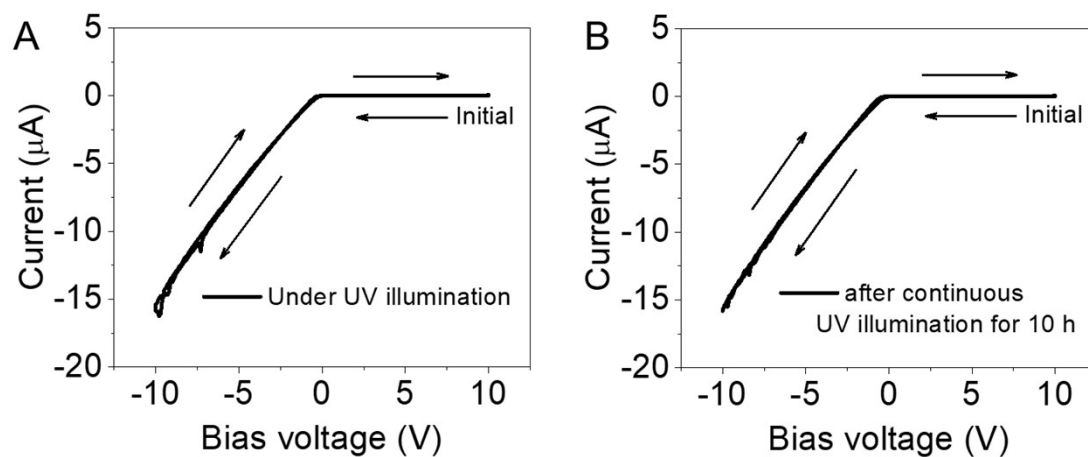

**Figure S8.** *I-V* curves of the rectifying diodes (A) under UV illumination and (B) after continuous UV illumination for 10 h. The illumination intensity was approximately  $50 \text{ mW cm}^{-2}$ , and the wavelength was 365 nm.

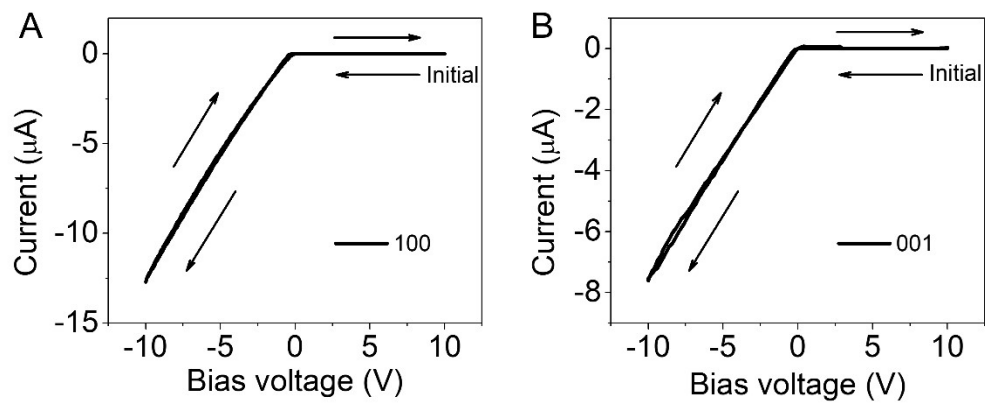

**Figure S9.** *I-V* curves of the rectifying diodes from (A) (100), and (B) (001) facet.

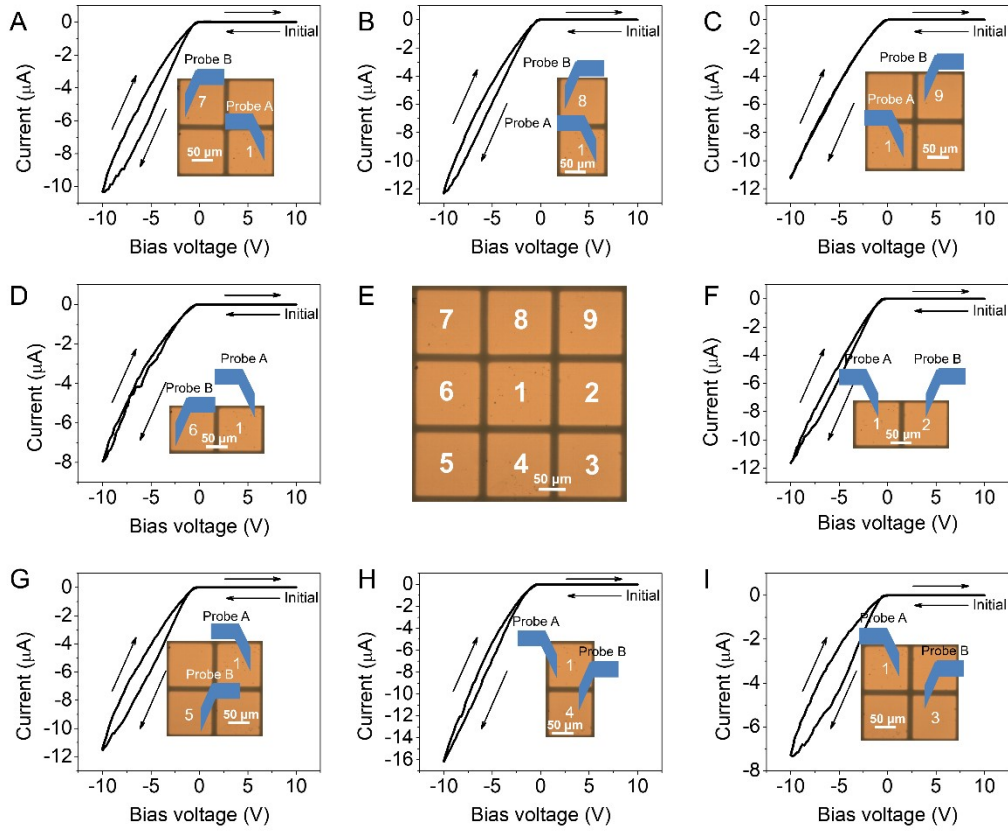

**Figure 10.**  $I$ - $V$  curves of the rectifying diode array from different sample orientations. Probe A is set to be put on electrode 1#, and sweeping direction is set to be from reverse to forward. A-D, (A) Probe B on electrode 7#, (B) Probe B on electrode 8#, (C) Probe B on electrode 9#, (D) Probe B on electrode 6#. (E) Optical image of the rectifying diode array. F-I, (F) Probe B on electrode 2#, (G) Probe B on electrode 5#, (H) Probe B on electrode 4#, (I) Probe B on electrode 3#.

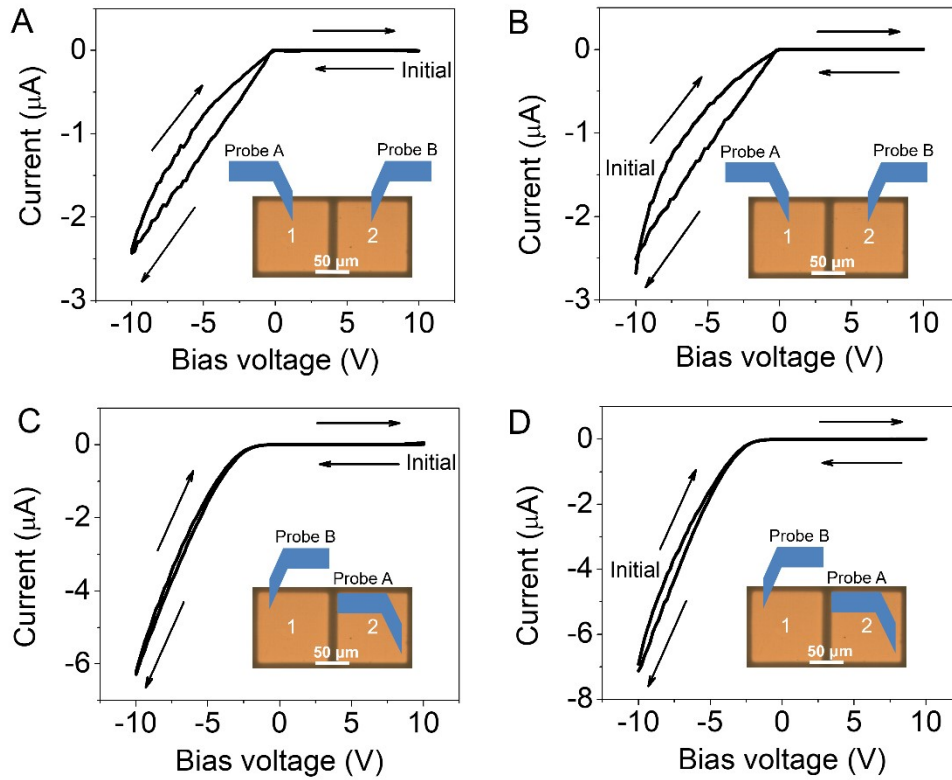

**Figure S11.  $I$ - $V$  curves of the same rectifying diode from different sample orientations and sweeping directions.** (A) Probe A on electrode 1#, probe B on electrode 2#, sweeping from reverse to forward. (B) Probe A on electrode 1#, probe B on electrode 2#, sweeping from forward to reverse. (C) Probe A on electrode 2#, probe B on electrode 1#, sweeping from reverse to forward. (D) Probe A on electrode 2#, probe B on electrode 1#, sweeping from forward to reverse.

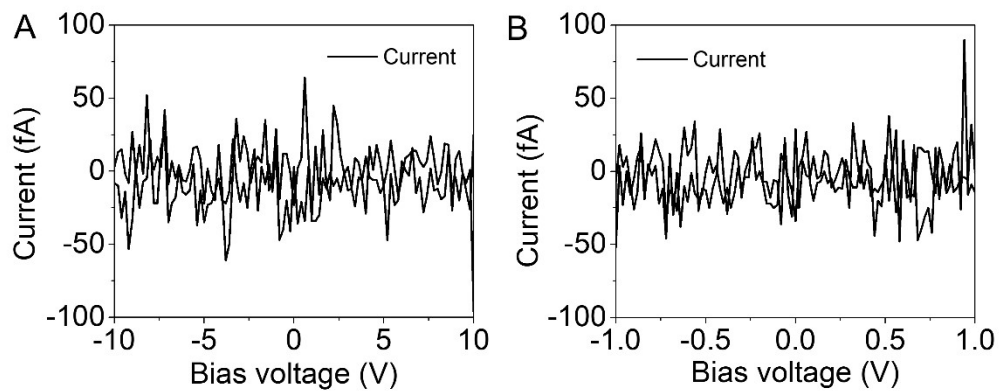

**Figure S12. Control experiments of the device based on pristine rutile crystal.** (A) Sweeping back and forth between 10 V and -10 V. (B) Sweeping back and forth between 1 V and -1 V.

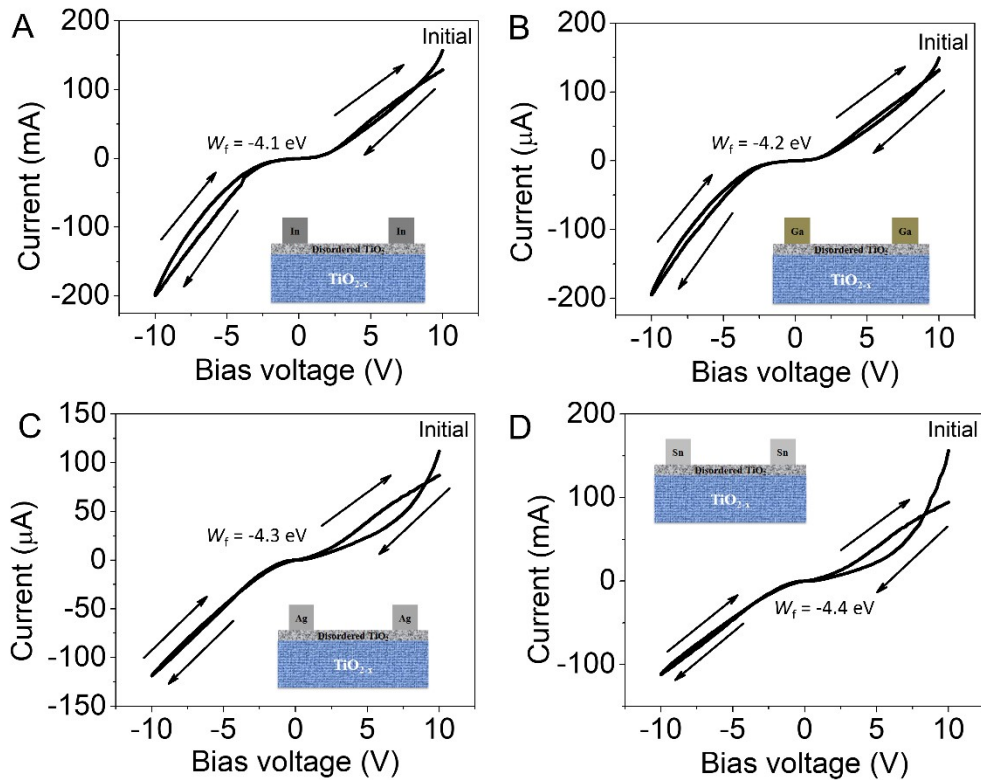

**Figure S13.**  $I$ - $V$  curves the devices with (A) Indium, (B) Gallium, (C) Silver, and (D) Tin electrode, respectively. Inset: schematic illustration of the device configurations.

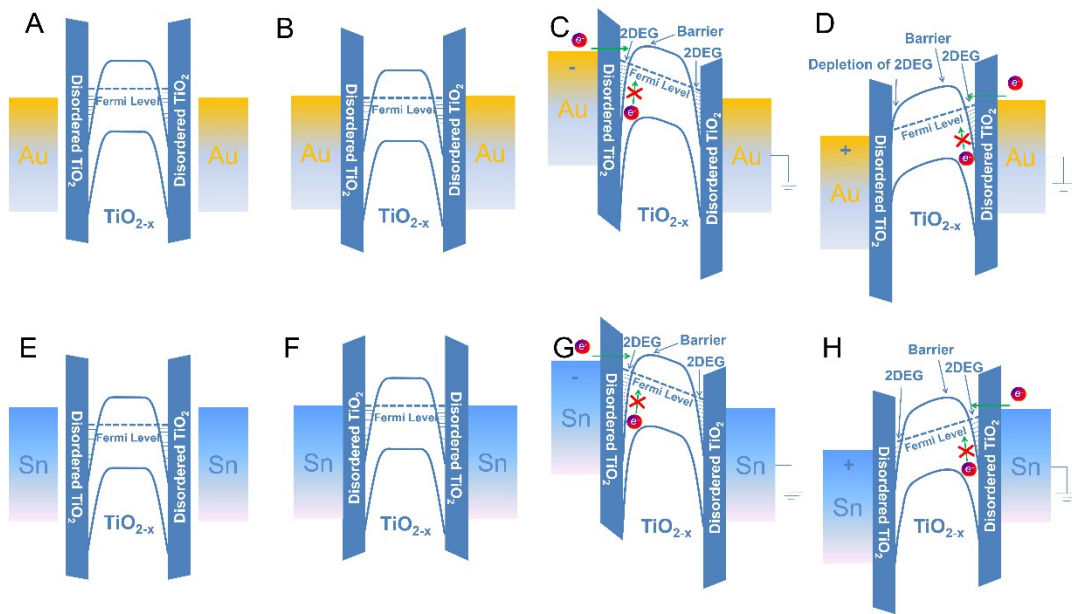

**Figure S14.** (A-D) Mechanism of the working device based on gold electrode. (E-H) Mechanism of the control device based on tin electrode.
